# Supplementary material for: Green nanotechnology for controlling bacterial load and heavy metal accumulation in Nile tilapia fish using biological selenium nanoparticles biosynthesized by Bacillus subtilis AS12
Source: PubMed Central journal article supplement (PMC9816870; doi:10.3389/fmicb.2022.1015613), 2022-12-23
Supplement: Data_Sheet_1.pdf [file Data_Sheet_1.pdf]

## *Supplementary material*

**Green nanotechnology for controlling bacterial load and heavy metal accumulation in Nile tilapia fish using biological selenium nanoparticles biosynthesized by *Bacillus subtilis* AS12**

**Ahmed M. Saad, Mahmoud Z. SitoHy, Mohamad I. Sultan-Alolama, Khaled A. El-Tarabily\* and Mohamed T. El-Saadony.**

**\* Correspondence:**

**Khaled A. El-Tarabily**  
[ktarabily@uaeu.ac.ae](mailto:ktarabily@uaeu.ac.ae)

### **Supplementary material**

**Figure S1. Neighbor-Joining phylogeny of the *Bacillus subtilis* species. Numbers at branch points indicated bootstrap percentages. Only species that have percentage identities greater than 99.25% are listed.**

**Figure S2. Characterization of bio-selenium nanoparticles (Bio-SeNPs) (A) binding energy X-ray photoelectron spectroscopy (XPS), (B) X-ray diffraction (XRD) image, (C) Scanning electron microscopy (SEM) image.**

**Figure S3. Fourier transform-infrared (FTIR) spectroscopy spectra of (A) active groups in bio-selenium nanoparticles (Bio-SeNPs), (B) active groups in *Bacillus subtilis* pellets supernatant.**

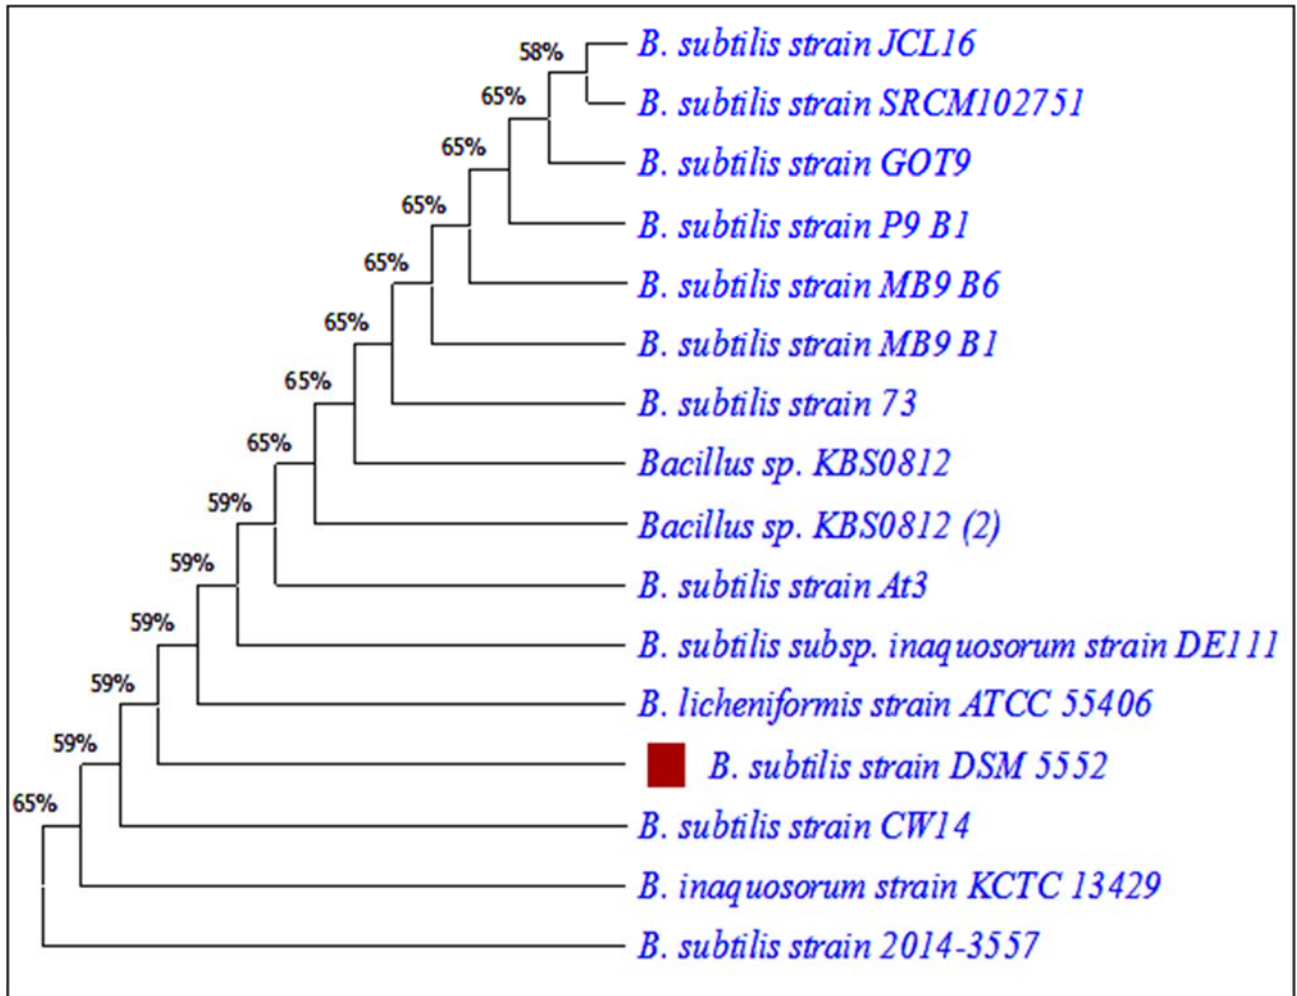

Figure S1. Neighbor-Joining phylogeny of the *Bacillus subtilis* species. Numbers at branch points indicated bootstrap percentages. Only species that have percentage identities greater than 99.25% are listed.

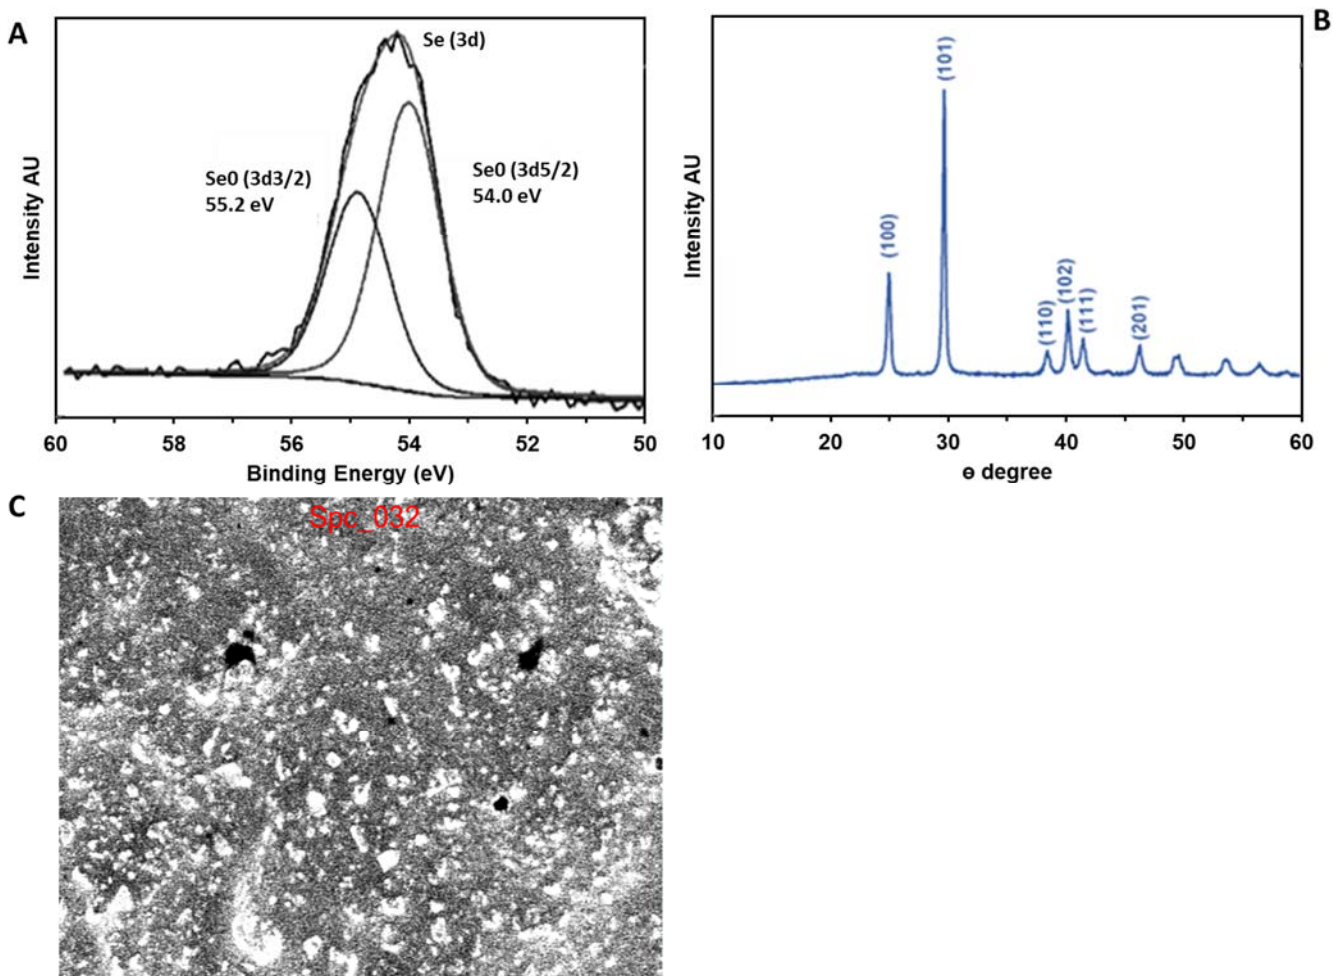

**Figure S2. Characterization of bio-selenium nanoparticles (Bio-SeNPs) (A) binding energy X-ray photoelectron spectroscopy (XPS), (B) X-ray diffraction (XRD) image, (C) Scanning electron microscopy (SEM) image.**

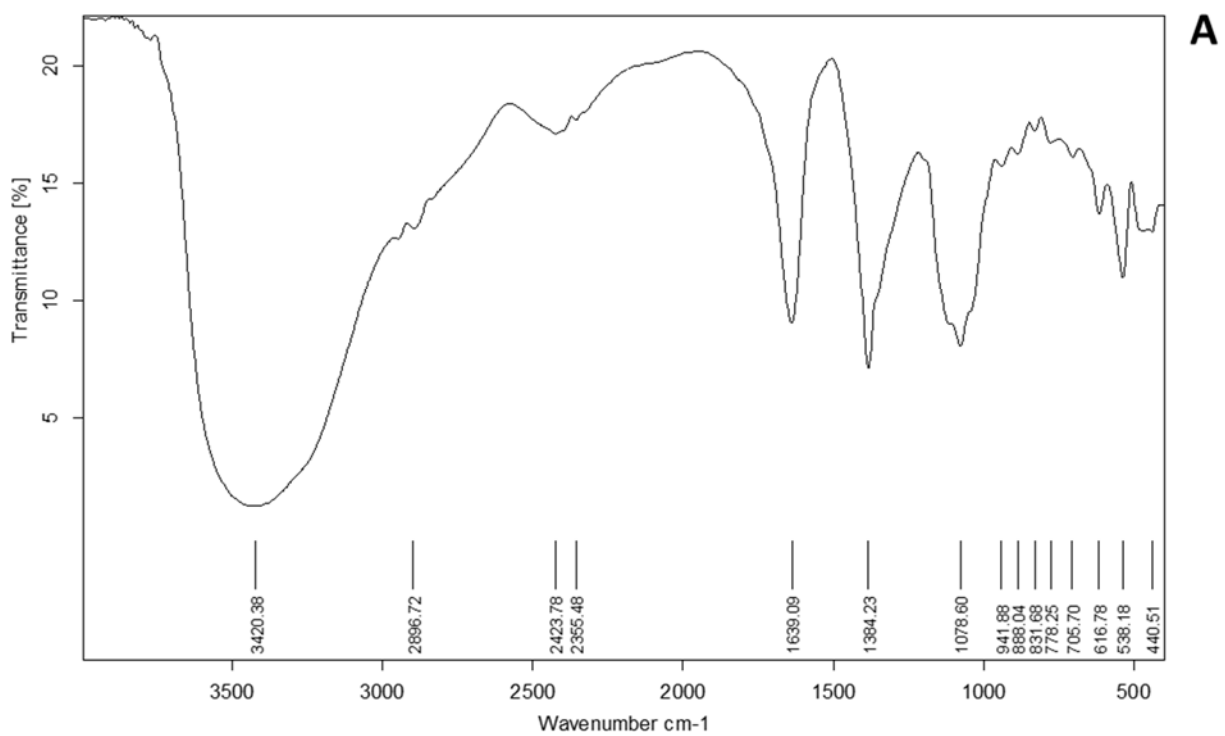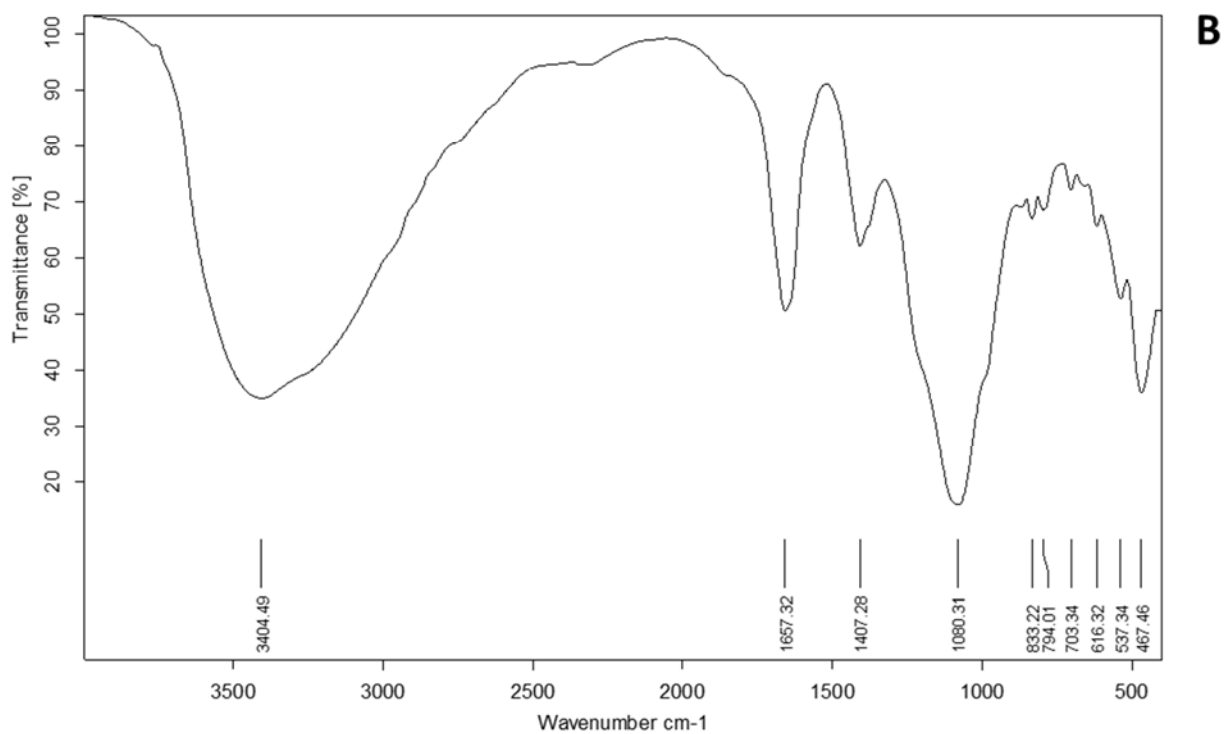

**Figure S3. Fourier transform-infrared (FTIR) spectroscopy spectra of (A) active groups in bio-selenium nanoparticles (Bio-SeNPs), (B) active groups in *Bacillus subtilis* pellets supernatant.**
